# Supplementary material for: Mapping the coevolution, leadership and financing of research on viral vectors, RNAi, CRISPR/Cas9 and other genomic editing technologies
Source: PLOS journal article supplement (doi:10.1371/journal.pone.0227593), 2020-04-15
Supplement: S1 (10.1371/journal.pone.0227593.s001) [file journal.pone.0227593.s001]

| Clusters                                                                                                     | Number of papers | Number of inter-citations | Percentage of papers of each one of the studied technologies             | Leading research institutions (Institutions with more papers in the top ten percent of papers with the highest indegree within each cluster) | Leading funding agencies (Agencies with more papers in the top ten percent of papers with the highest indegree within each cluster) | Stage of the investigation<br><br>Type of leading research organizations and funding entities |
|--------------------------------------------------------------------------------------------------------------|------------------|---------------------------|--------------------------------------------------------------------------|----------------------------------------------------------------------------------------------------------------------------------------------|-------------------------------------------------------------------------------------------------------------------------------------|-----------------------------------------------------------------------------------------------|
| 1966-2000                                                                                                    |                  |                           |                                                                          |                                                                                                                                              |                                                                                                                                     |                                                                                               |
| C1-2000: "Retroviral vectors for gene expression; hematopoietic cells"                                       | 438              | 1352                      | Viral vectors: 98.5%<br>meganucleases: 1.4%                              | National Institutes of Health USA<br>University of Southern California<br>Children's Hospital Los Angeles                                    | National Institutes of Health USA                                                                                                   | Invention<br><br>Academic institutions with public funding                                    |
| C2-2000: "Recombinant adeno-associated virus vectors"                                                        | 296              | 2241                      | viral vectors: 100%                                                      | University of North Carolina at Chapel Hill<br>University of Pennsylvania                                                                    | National Institutes of Health USA                                                                                                   | Invention<br><br>Academic institutions with public funding                                    |
| C3-2000: "Immune response to adenoviral vectors"                                                             | 248              | 638                       | viral vectors: 100%                                                      | Baylor College of Medicine<br>Howard Hughes Medical Institute                                                                                | National Institutes of Health USA                                                                                                   | Invention<br><br>Academic institutions with public funding                                    |
| C4-2000: "Molecular biology of adeno-associated virus; Rep78"                                                | 229              | 2030                      | viral vectors: 100%                                                      | University of Florida                                                                                                                        | National Institutes of Health USA                                                                                                   | Basic research<br><br>Academic institutions with public funding                               |
| C5-2000: "lentiviral vectors; lentiviral vectors pseudotyped with vesicular stomatitis virus G glycoprotein" | 146              | 480                       | viral vectors: 100%                                                      | Salk Institute for Biological Studies<br>University of California San Diego                                                                  | National Institutes of Health USA                                                                                                   | Improvement<br><br>Academic institutions with public funding                                  |
| C6-2000: "Targeted retroviral vectors"                                                                       | 128              | 270                       | viral vectors: 100%                                                      | No leading research institution identified                                                                                                   | National Institutes of Health USA                                                                                                   | Improvement<br><br>Leading research institutions and funding agencies not identified          |
| C7-2000: "Mechanisms and function of post-transcriptional gene silencing; Plants; C. elegans"                | 48               | 142                       | RNAi: 100%                                                               | No leading research institution identified                                                                                                   | No leading founding agency identified                                                                                               | Basic research<br><br>Leading research institutions and funding agencies not identified       |
| C8-2000: "Homing endonucleases: structure and function"                                                      | 45               | 225                       | meganucleases: 100%                                                      | Fred Hutchinson Cancer Research Center<br>University of Washington                                                                           | No leading founding agency identified                                                                                               | Basic research<br><br>Academic institutions                                                   |
| 2001-2005                                                                                                    |                  |                           |                                                                          |                                                                                                                                              |                                                                                                                                     |                                                                                               |
| C1-2005: "AAV vectors; AAV serotypes"                                                                        | 419              | 1530                      | Viral vectors: 99.8%<br>RNAi/viral vectors combined: 0.2%                | University of Florida<br>National Institutes of Health USA<br>University of Pennsylvania                                                     | National Institutes of Health USA                                                                                                   | Application<br><br>Academic institutions with public funding                                  |
| C2-2005: "RNA interference (RNAi) pathway; Drosophila"                                                       | 280              | 1884                      | RNAi: 99.2%<br>Viral vectors: 08%                                        | Cold Spring Harbor Laboratory<br>University of Massachusetts Medical School<br>Howard Hughes Medical Institute                               | National Institutes of Health USA                                                                                                   | Basic research<br><br>Academic institutions with public funding                               |
| C3-2005: "Efficient transduction of mammalian cells by lentiviral vectors"                                   | 313              | 769                       | Viral vectors: 99.4%<br>RNAi: 0.4%                                       | University of Turin<br>Fondazione del Piemonte per l'Oncologia – IRCCS<br>Salk Institute for Biological Studies<br>University of Geneva      | National Institutes of Health USA                                                                                                   | Improvement<br><br>Academic institutions with public funding                                  |
| C4-2005: "RNA interference in mammalian cells"                                                               | 252              | 947                       | RNAi: 90.1%<br>RNAi/viral vectors combined: 3.2%<br>Viral vectors: 6.7%  | Cold Spring Harbor Laboratory                                                                                                                | National Institutes of Health USA                                                                                                   | Invention<br><br>Academic institutions with public funding                                    |
| C5-2005: "Genome-wide analysis of gene function by high-throughput RNAi screening"                           | 155              | 393                       | RNAi: 97.4%<br>RNAi/viral vectors combined: 1.3%<br>Viral vectors: 1.3%  | University of Cambridge<br>Cold Spring Harbor Laboratory<br>Howard Hughes Medical Institute<br>Harvard University                            | Wellcome Trust                                                                                                                      | Research tool<br><br>Participation of philanthropic foundations or for-profit organizations   |
| C6-2005: "Helper-dependent adenoviral vectors; toxicity of first-generation adenoviral vectors"              | 144              | 338                       | Viral vectors: 100%                                                      | Baylor College of Medicine<br>University of Pennsylvania<br>The Wistar Institute                                                             | National Institutes of Health USA                                                                                                   | Application<br><br>Academic institutions with public funding                                  |
| C7-2005: "Site-specific DNA activity of the AAV Rep protein"                                                 | 108              | 238                       | Viral vectors: 100%                                                      | Icahn School of Medicine at Mount Sinai                                                                                                      | National Institutes of Health USA                                                                                                   | Basic research<br><br>Academic institutions with public funding                               |
| C10-2005: "DNA binding site/specificity of homing endonucleases"                                             | 59               | 183                       | Meganucleases: 84.7%<br>ZFNs: 15.3%                                      | Fred Hutchinson Cancer Research Center<br>Université Laval<br>University of Washington Seattle                                               | National Institutes of Health USA                                                                                                   | Basic research<br><br>Academic institutions with public funding                               |
| 2006-2010                                                                                                    |                  |                           |                                                                          |                                                                                                                                              |                                                                                                                                     |                                                                                               |
| C1-2010: "AAV vectors; AAV serotypes; Cell/tissue tropism"                                                   | 361              | 890                       | Viral vectors: 96.4%<br>RNAi/viral vectors combined: 1.4%<br>RNAi: 2.2%  | University of Pennsylvania<br>University of Florida<br>University of North Carolina Chapel Hill                                              | National Institutes of Health USA                                                                                                   | Application<br><br>Academic institutions with public funding                                  |
| C2-2010: "Induction of RNAi by double-stranded RNA (dsRNA)"                                                  | 231              | 507                       | RNAi: 99.2%<br>Viral vectors: 0.8%                                       | CSIC Instituto de Biología Molecular de Barcelona<br>University of California System                                                         | National Institutes of Health USA<br>Wellcome Trust                                                                                 | Basic research<br><br>Participation of philanthropic foundations or for-profit organizations  |
| C3-2010: "Inhibition of virus replication; Small interfering RNAs (siRNAs)"                                  | 218              | 379                       | RNAi: 88.5%<br>RNAi/viral vectors combined: 6%<br>Viral vectors: 5.5%    | Amylin Pharmaceuticals Inc                                                                                                                   | National Institutes of Health USA                                                                                                   | Application<br><br>Participation of philanthropic foundations or for-profit organizations     |
| C4-2010: "short hairpin RNAs (ShRNA)"                                                                        | 207              | 310                       | RNAi: 82.2%<br>Viral vectors: 10.1%<br>RNAi/viral vectors combined: 7.7% | University of California System                                                                                                              | National Institutes of Health USA                                                                                                   | Improvement<br><br>Academic institutions with public funding                                  |
|                                                                                                              |                  |                           |                                                                          |                                                                                                                                              |                                                                                                                                     |                                                                                               |

|                                                                                                           |     |      |                                                                                                                                                                                                    |                                                                                                                                                                                                                                                |                                                                                                                                                                                                      |                                                                                          |
|-----------------------------------------------------------------------------------------------------------|-----|------|----------------------------------------------------------------------------------------------------------------------------------------------------------------------------------------------------|------------------------------------------------------------------------------------------------------------------------------------------------------------------------------------------------------------------------------------------------|------------------------------------------------------------------------------------------------------------------------------------------------------------------------------------------------------|------------------------------------------------------------------------------------------|
| C5-2010: "Genome-wide RNAi screens (Mostly in Drosophila)"                                                | 192 | 387  | RNAi: 98%<br>RNAi/viral vectors combined: 1%<br>Viral vectors: 1%                                                                                                                                  | Harvard University<br>Howard Hughes Medical Institute<br>VA Boston Healthcare System                                                                                                                                                           | National Institutes of Health USA<br>Howard Hughes Medical Institute                                                                                                                                 | Research tool<br>Academic institutions with public funding                               |
| C6-2010: "Self-inactivating retroviral vectors; Insertional mutagenesis"                                  | 181 | 433  | Viral vectors 97.8%<br>RNAi: 2.2%                                                                                                                                                                  | Cincinnati Children's Hospital Medical Center<br>Hannover Medical School<br>University of Cincinnati<br>Helmholtz Association                                                                                                                  | National Institutes of Health USA                                                                                                                                                                    | Improvement/Application<br>Academic institutions with public funding                     |
| C7-2010: "Lentiviral vectors for immunization"                                                            | 133 | 322  | Viral vectors: 97.5%<br>RNAi: 2.5%                                                                                                                                                                 | University College London                                                                                                                                                                                                                      | National Institutes of Health USA                                                                                                                                                                    | Application<br>Academic institutions with public funding                                 |
| C8-2010: "Adenoviral vectors; adeno-associated; pre-clinical gene therapy"                                | 104 | 148  | Viral vectors: 96.1%<br>RNAi: 2.9%<br>RNAi/viral vectors combined: 1%                                                                                                                              | Baylor College of Medicine<br>Cedars-Sinai Medical Center<br>David Geffen School of Medicine at UCLA                                                                                                                                           | National Institutes of Health USA                                                                                                                                                                    | Application<br>Academic institutions with public funding                                 |
| C9-2010: "Genome editing driven by zinc-finger nucleases (ZFNs)"                                          | 85  | 502  | ZFNs: 78.7%<br>Meganucleases: 7.1%<br>Viral vectors: 11.8%<br>RNAi: 1.2%<br>ZFNs/viral vectors combined: 1.2%                                                                                      | Sangamo BioSciences Inc                                                                                                                                                                                                                        | National Institutes of Health USA                                                                                                                                                                    | Invention<br>Participation of philanthropic foundations or for-profit organizations      |
| C12-2010: "Engineered homing endonucleases; I-Dmol as scaffold for protein engineering; meganucleases"    | 64  | 160  | Meganucleases: 90.6%<br>Viral vectors 9.4%                                                                                                                                                         | Fred Hutchinson Cancer Research Center<br>University of Washington Seattle                                                                                                                                                                     | National Institutes of Health USA                                                                                                                                                                    | Invention<br>Academic institutions with public funding                                   |
| C14-2010: "CRISPR as a component of the antiviral system of prokaryotes"                                  | 53  | 256  | CRISPR: 100%                                                                                                                                                                                       | Danisco France SAS<br>Université Laval                                                                                                                                                                                                         | National Institutes of Health USA                                                                                                                                                                    | Basic research<br>Participation of philanthropic foundations or for-profit organizations |
| 2011-2015                                                                                                 |     |      |                                                                                                                                                                                                    |                                                                                                                                                                                                                                                |                                                                                                                                                                                                      |                                                                                          |
| C1-2015: "RNA-guided genome editing via Cas9"                                                             | 534 | 4809 | CRISPR: 89%<br>TALENs: 2.6%<br>RNAi: 2.6%<br>Genome editing platforms combined: 2.2%<br>Viral vectors 1.1%<br>ZFNs: 0.9%<br>Meganucleases: 0.9%<br>Genome editing/viral vectors combined: 0.7%     | Broad Institute<br>Harvard University<br>Massachusetts Institute of Technology<br>Howard Hughes Medical Institute                                                                                                                              | National Institutes of Health USA<br>Damon Runyon Foundation<br>Howard Hughes Medical Institute<br>Klingenstein Foundation<br>Searle Scholars Foundation<br>Simons Foundation<br>W M Keck Foundation | Invention<br>Participation of philanthropic foundations or for-profit organizations      |
| C2-2015: "RNAi for Insect Control; delivery of dsRNA for pest control"                                    | 413 | 800  | RNAi: 98.3%<br>RNAi/viral vectors combined: 0.5%<br>Viral vectors: 1.2%                                                                                                                            | University of California System<br>University of Edinburgh<br>Harvard University<br>National Centre of Scientific Research Demokritos                                                                                                          | National Institutes of Health USA<br>Research Foundation - Flanders (FWO)<br>National Natural Science Foundation of China<br>Wellcome Trust                                                          | Application<br>Participation of philanthropic foundations or for-profit organizations    |
| C3-2015: "Genome editing using TALENs and ZFNs"                                                           | 404 | 1525 | TALENs: 41.1%<br>ZFNs: 34.4%<br>Viral vectors: 8.2%<br>CRISPR: 5.4%<br>Meganucleases: 4.2%<br>Genome editing platforms combined: 3.2%<br>RNAi: 2.7%<br>Genome editing/viral vectors combined: 0.7% | Harvard University<br>VA Boston Healthcare system<br>Massachusetts General Hospital                                                                                                                                                            | National Institutes of Health USA<br>National Science Foundation USA                                                                                                                                 | Invention (TALENs)/improvement (ZFNs)<br>Academic institutions with public funding       |
| C4-2015: "AAV vectors; AAV serotypes; Clinical applications/trials"                                       | 361 | 756  | Viral vectors: 95.8%<br>RNAi: 2.5%<br>RNAi/viral vectors combined: 1.7%                                                                                                                            | State University System of Florida<br>University of North Carolina<br>University of California System<br>University of Pennsylvania                                                                                                            | National Institutes of Health USA                                                                                                                                                                    | Improvement<br>Academic institutions with public funding                                 |
| C5-2015: "CRISPR RNA (crRNA); CRISPR/Cas mediated adaptive immunity system; crRNA-guided Cascade complex" | 329 | 2909 | CRISPR: 100%                                                                                                                                                                                       | United States Department of Energy<br>Wageningen University Research<br>Howard Hughes Medical Institute<br>Lawrence Berkeley National Laboratory                                                                                               | National Institutes of Health USA<br>National Science Foundation USA                                                                                                                                 | Basic research<br>Academic institutions with public funding                              |
| C6-2015: "Lentiviral vector; clinical trials"                                                             | 204 | 329  | Viral vectors: 97.5%<br>RNAi: 1.5%<br>RNAi/viral vectors combined: 1%                                                                                                                              | Fundazione Telethon<br>Vita Salute San Raffaele University<br>Helmholtz Association, German Cancer Research Center<br>Institut national de la santé et de la recherche médicale<br>Ruprecht-Karls-Universität Heidelberg, University of London | Fundazione Telethon<br>European Union<br>German Research Foundation                                                                                                                                  | Innovation<br>Academic institutions with public funding                                  |

|                                                                                     |     |     |                                                                                                                                                                                               |                                                                                                                                                           |                                                                                                                                                 |                                                                                           |
|-------------------------------------------------------------------------------------|-----|-----|-----------------------------------------------------------------------------------------------------------------------------------------------------------------------------------------------|-----------------------------------------------------------------------------------------------------------------------------------------------------------|-------------------------------------------------------------------------------------------------------------------------------------------------|-------------------------------------------------------------------------------------------|
| C7-2015: "RNAi Screening"                                                           | 183 | 255 | RNAi: 95.7%<br>Viral vectors: 1.1%<br>CRISPR: 0.5%<br>TALENs: 0.5%<br>RNAi/viral vectors combined: 2.2%                                                                                       | Harvard University<br>Helmholtz Association<br>German Cancer Research Center<br>Howard Hughes Medical Institute<br>Memorial Sloan Kettering Cancer Center | National Institutes of Health USA<br><br>European Union                                                                                         | Research tool<br><br>Academic institutions with public funding                            |
| C9-2015: "Genome Engineering of Drosophila and Caenorhabditis with the CRISPR/Cas9" | 83  | 429 | CRISPR: 68.7%<br>RNAi: 20.5%<br>TALENs: 8.4%<br>RNAi/viral vectors combined: 1.2%<br>ZFNs: 1.2%                                                                                               | Harvard University                                                                                                                                        | National Institutes of Health USA                                                                                                               | Improvement<br><br>Academic institutions with public funding                              |
| C10-2015: "Engineered LAGLIDADG homing endonucleases (LHEs)"                        | 53  | 113 | Meganucleases: 88.7<br>Viral vectors: 7.5%<br>ZFNs: 3.8%                                                                                                                                      | University of Washington Seattle<br>Fred Hutchinson Cancer Center                                                                                         | National Institutes of Health USA                                                                                                               | Improvement<br><br>Academic institutions with public funding                              |
| C11-2015: "CRISPR/Cas and TALENs systems as tools for genome engineering in plants" | 42  | 172 | CRISPR: 76.2<br>TALENs: 11.9%<br>ZFNs: 9.5%<br>RNA1: 2.4                                                                                                                                      | Chinese Academy of Science                                                                                                                                | Chinese Academy of Science<br><br>National Natural Science Foundation of China                                                                  | Application<br><br>Academic institutions with public funding                              |
| 2016-2019                                                                           |     |     |                                                                                                                                                                                               |                                                                                                                                                           |                                                                                                                                                 |                                                                                           |
| C1-2019: "Cas9-mediated correction of diseases; delivery of CRISPR/Cas9"            | 349 | 804 | CRISPR: 78.2%<br>Viral vectors: 6.9%<br>Genome editing/viral vectors combined: 6%<br>RNAi: 3.7%<br>TALEN: 1.4%<br>ZFNs: 1.4%<br>Genome editing platforms combined: 1.2%<br>Meganucleases 1.1% | University of California System<br>Harvard University<br>Chinese Academy of Science                                                                       | National Institutes of Health USA<br><br>National Natural Science Foundation of China<br><br>National High Technology Research Program of China | Application<br><br>Academic institutions with public funding                              |
| C2-2019: "Crispr-cas9-based genetic screens"                                        | 294 | 729 | CRISPR: 92.8%<br>RNAi: 3.7%<br>CRISPR/RNAi combined: 1.4%<br>TALENs: 1.4%<br>Viral vectors: 0.7%                                                                                              | Harvard University<br>Broad Institute<br>Massachusetts Institute of Technology                                                                            | National Institutes of Health USA<br><br>National Science Foundation USA                                                                        | Research tool<br><br>Academic institutions with public funding                            |
| C3-2019: "Cas9 off-target activity; Cas9 cleavage"                                  | 284 | 764 | CRISPR: 95.6%<br>TALEN: 1.8%<br>RNAi: 0.7%<br>Viral vectors: 0.7%<br>ZFNs: 0.4%<br>Genome editing/viral vectors combined: 0.4%<br>Genome editing platforms combined: 0.4%                     | University of California System<br>Harvard University<br>Howard Hughes Medical Institute                                                                  | National Institutes of Health USA<br><br>National Science Foundation USA                                                                        | Improvement/application<br><br>Academic institutions with public funding                  |
| C5-2019: "Mechanisms of crispr-cas immunity; Crispr-cas immunity systems"           | 204 | 772 | CRISPR: 100%                                                                                                                                                                                  | University of California Berkeley<br>Rockefeller University<br>Howard Hughes Medical Institute                                                            | National Institutes of Health USA<br><br>National Science Foundation USA                                                                        | Basic research<br><br>Academic institutions with public funding                           |
| C6-2019: "CRISPR/Cas systems as tools for genome engineering in plants"             | 186 | 388 | CRISPR: 91%<br>TALENs: 3.2%<br>Genome editing platforms combined: 1.6%<br>RNAi: 1.6%<br>ZFNs: 1.6%<br>CRISPR/RNAi combined: 0.5%<br>Viral vectors: 0.5%                                       | Chinese Academy of Science<br>Purdue University<br>University of Queensland                                                                               | National Natural Science Foundation of China<br><br>Chinese Academy of Science                                                                  | Improvement/application<br><br>Academic institutions with public funding                  |
| C7-2019: "Adeno-associated virus (AAV) vectors"                                     | 178 | 211 | Viral vectors: 87.1%<br>CRISPR: 11.2%<br>RNAi: 1.1%<br>CRISPR/RNAi combined: 0.6%                                                                                                             | University of Florida<br>University of North Carolina Chapel Hill                                                                                         | National Institutes of Health USA<br><br>National Natural Science Foundation of China                                                           | Improvement/application<br><br>Academic institutions with public funding                  |
| C8-2019: "CRISPR-associated endonuclease in Prevotella and Francisella 1 (cpf1)"    | 175 | 574 | CRISPR: 95.5%<br>RNAi: 1.7%<br>Genome editing platforms combined: 1.1%<br>Viral vectors: 1.1%<br>RNAi/viral vectors combined: 0.6%                                                            | Harvard University<br>Broad Institute<br>Massachusetts Institute of Technology                                                                            | National Institutes of Health USA<br><br>Vallee Foundation<br>New York Stem Cell Foundation<br>Simons Foundation                                | Improvement<br><br>Participation of philanthropic foundations or for-profit organizations |

|                                                                                        |     |     |                                                                                                                                                                                                           |                                                                                                                                   |                                                                                                                                                |                                                                                           |
|----------------------------------------------------------------------------------------|-----|-----|-----------------------------------------------------------------------------------------------------------------------------------------------------------------------------------------------------------|-----------------------------------------------------------------------------------------------------------------------------------|------------------------------------------------------------------------------------------------------------------------------------------------|-------------------------------------------------------------------------------------------|
| C9-2019: "CRISPR/Cas9 and CRISPRi systems for metabolic engineering of bacteria"       | 151 | 296 | CRISPR: 97.2%<br>CRISPR/RNAi combined: 0.7%<br>Genome editing platforms combined: 0.7%<br>RNAi: 0.7%<br>TALENs: 0.7%                                                                                      | Chinese Academy of Science<br>National Tsing Hua University (Taiwan)<br>University of Illinois Urbana-Champaign                   | National Science Foundation USA<br>Ministry of Science and Technology of Taiwan<br>National Institutes of Health USA                           | Application<br><br>Academic institutions with public funding                              |
| C10-2019: "Degradation of dsRNA as a factor of RNAi efficiency in insect pest control" | 101 | 168 | RNAi: 94%<br>CRISPR: 5%<br>Viral vectors: 1%                                                                                                                                                              | Ghent University<br>University of Kentucky                                                                                        | Center for Arthropod Management Technologies<br>National Institute of Food and Agriculture USA<br>National Natural Science Foundation of China | Application<br><br>Academic institutions with public funding                              |
| C11-2019: "CRISPR/Cas-based gene drive for insect pest control"                        | 96  | 179 | CRISPR: 91.6%<br>RNAi: 4.2%<br>TALENs: 2.1%<br>Genome editing platforms combined: 1%<br>Meganucleases: 1%                                                                                                 | Chinese Academy of Science                                                                                                        | National Natural Science Foundation of China                                                                                                   | Application<br><br>Academic institutions with public funding                              |
| C12-2019: "Application of CRISPR/Cas technology in livestock research"                 | 89  | 112 | CRISPR: 82.1%<br>RNAi: 9%<br>TALENs 5.6%<br>Viral vectors 1.1%<br>ZFN: 1.1%<br>Meganucleases 1.1%                                                                                                         | Friedrich Loeffler Institute<br>Jilin University<br>Northwest A&F University<br>ShanghaiTech University                           | National Natural Science Foundation of China                                                                                                   | Application<br><br>Academic institutions with public funding                              |
| C13-2019: "Crispr-cas9 based genome editing in fungus species"                         | 85  | 167 | CRISPR: 95.2%<br>TALENs 2.4%<br>Viral vectors: 1.2%<br>RNAi: 1.2%                                                                                                                                         | No leading research institution identified                                                                                        | No leading founding agency identified                                                                                                          | Application<br><br>Leading research institutions and funding agencies not identified      |
| C14-2019: "Development of Crispr/Cas9 based HIV-1 therapeutics"                        |     |     | CRISPR: 73.5%<br>Viral vectors: 14.5%<br>ZFNS: 4.8%<br>Genome editing/viral vectors combined: 3.6%<br>TALENs: 2.4%<br>RNAi: 1.2%<br>CRISPR/RNAi combined: 1.2%<br>Genome editing platforms combined: 1.2% | Academic Medical Center-University of Amsterdam                                                                                   | National Natural Science Foundation of China<br>Chinese Academy of Science                                                                     | Application<br><br>Academic institutions with public funding                              |
| C15-2019: "Deactivated Crispr-cas9 (dCas9)"                                            | 76  | 129 | CRISPR: 96.1%<br>Viral vectors: 1.3%<br>RNAi 2.6%                                                                                                                                                         | University of California System<br>Harvard University<br>Howard Hughes Medical Institute<br>Massachusetts Institute of Technology | National Institutes of Health USA<br>National Science Foundation USA                                                                           | Improvement<br><br>Academic institutions with public funding                              |
| C16-2019: "Anti-CRISPR phage-encoded proteins as 'off-switch' tools"                   | 70  | 310 | CRISPR: 100%                                                                                                                                                                                              | University of California System<br>University of Toronto                                                                          | National Institutes of Health USA<br>Canadian Institutes of Health Research<br>National Science Foundation USA<br>Sandler Foundation           | Improvement<br><br>Participation of philanthropic foundations or for-profit organizations |
| C17-2019: "Cas9-cytidine deaminase fusion for individual bases editing"                | 59  | 111 | RISPR: 94.6%<br>Genome editing/viral vectors combined: 5.4%                                                                                                                                               | Harvard University<br>Broad Institute<br>Massachusetts Institute of Technology                                                    | National Institutes of Health USA<br>Japan Agency for Medical Research and Development<br>Japan Society for the Promotion of Science           | Improvement<br><br>Academic institutions with public funding                              |
